# Supplementary material for: RNA-Seq-Based Transcriptome Analysis of Aflatoxigenic Aspergillus flavus in Response to Water Activity
Source: PubMed Central journal article supplement (PMC4247253; doi:10.3390/toxins6113187), 2014-11-21
Supplement: toxins-06-03187-s001.pdf [file toxins-06-03187-s001.pdf]

## Supplementary Information

**Table S1.** Annotation of all-unigenes for the *A. flavus* transcriptome by KEGG classification.

|    | <b>Pathway</b>                              | <b>All genes with pathway annotation (12232)</b> | <b>Pathway ID</b> |
|----|---------------------------------------------|--------------------------------------------------|-------------------|
| 1  | Metabolic pathways                          | 3520 (28.78%)                                    | ko01100           |
| 2  | Biosynthesis of secondary metabolites       | 1543 (12.61%)                                    | ko01110           |
| 3  | Starch and sucrose metabolism               | 593 (4.85%)                                      | ko00500           |
| 4  | RNA transport                               | 477 (3.9%)                                       | ko03013           |
| 5  | Amino sugar and nucleotide sugar metabolism | 432 (3.53%)                                      | ko00520           |
| 6  | Purine metabolism                           | 410 (3.35%)                                      | ko00230           |
| 7  | MAPK signaling pathway—yeast                | 407 (3.33%)                                      | ko04011           |
| 8  | Cell cycle—yeast                            | 350 (2.86%)                                      | ko04111           |
| 9  | Protein processing in endoplasmic reticulum | 313 (2.56%)                                      | ko04141           |
| 10 | Meiosis—yeast                               | 299 (2.44%)                                      | ko04113           |
| 11 | Glycerophospholipid metabolism              | 284 (2.32%)                                      | ko00564           |
| 12 | RNA degradation                             | 280 (2.29%)                                      | ko03018           |
| 13 | Ribosome                                    | 279 (2.28%)                                      | ko03010           |
| 14 | Pyrimidine metabolism                       | 274 (2.24%)                                      | ko00240           |
| 15 | Endocytosis                                 | 269 (2.2%)                                       | ko04144           |
| 16 | Spliceosome                                 | 267 (2.18%)                                      | ko03040           |
| 17 | Lysine degradation                          | 240 (1.96%)                                      | ko00310           |
| 18 | Peroxisome                                  | 239 (1.95%)                                      | ko04146           |
| 19 | Butanoate metabolism                        | 219 (1.79%)                                      | ko00650           |
| 20 | Ribosome biogenesis in eukaryotes           | 212 (1.73%)                                      | ko03008           |
| 21 | Tyrosine metabolism                         | 208 (1.7%)                                       | ko00350           |
| 22 | Fructose and mannose metabolism             | 207 (1.69%)                                      | ko00051           |
| 23 | Tryptophan metabolism                       | 198 (1.62%)                                      | ko00380           |
| 24 | mRNA surveillance pathway                   | 197 (1.61%)                                      | ko03015           |
| 25 | Glycine, serine and threonine metabolism    | 188 (1.54%)                                      | ko00260           |
| 26 | Steroid biosynthesis                        | 168 (1.37%)                                      | ko00100           |
| 27 | Arginine and proline metabolism             | 166 (1.36%)                                      | ko00330           |
| 28 | Cyanoamino acid metabolism                  | 164 (1.34%)                                      | ko00460           |
| 29 | Fatty acid metabolism                       | 156 (1.28%)                                      | ko00071           |
| 30 | Glutathione metabolism                      | 152 (1.24%)                                      | ko00480           |
| 31 | Galactose metabolism                        | 149 (1.22%)                                      | ko00052           |
| 32 | Glycolysis / Gluconeogenesis                | 142 (1.16%)                                      | ko00010           |
| 33 | Ubiquitin mediated proteolysis              | 141 (1.15%)                                      | ko04120           |
| 34 | Phenylalanine metabolism                    | 139 (1.14%)                                      | ko00360           |
| 35 | ABC transporters                            | 138 (1.13%)                                      | ko02010           |
| 36 | Linoleic acid metabolism                    | 138 (1.13%)                                      | ko00591           |
| 37 | Oxidative phosphorylation                   | 136 (1.11%)                                      | ko00190           |
| 38 | Histidine metabolism                        | 133 (1.09%)                                      | ko00340           |
| 39 | Nitrogen metabolism                         | 124 (1.01%)                                      | ko00910           |
| 40 | Glycerolipid metabolism                     | 119 (0.97%)                                      | ko00561           |
| 41 | RNA polymerase                              | 117 (0.96%)                                      | ko03020           |
| 42 | Pyruvate metabolism                         | 114 (0.93%)                                      | ko00620           |

Table S1. *Cont.*

|    | Pathway                                               | All genes with pathway annotation (12232) | Pathway ID |
|----|-------------------------------------------------------|-------------------------------------------|------------|
| 43 | Homologous recombination                              | 113 (0.92%)                               | ko03440    |
| 44 | Fatty acid biosynthesis                               | 107 (0.87%)                               | ko00061    |
| 45 | Cysteine and methionine metabolism                    | 107 (0.87%)                               | ko00270    |
| 46 | Pentose and glucuronate interconversions              | 106 (0.87%)                               | ko00040    |
| 47 | Nucleotide excision repair                            | 104 (0.85%)                               | ko03420    |
| 48 | Methane metabolism                                    | 103 (0.84%)                               | ko00680    |
| 49 | Non-homologous end-joining                            | 103 (0.84%)                               | ko03450    |
| 50 | Phagosome                                             | 103 (0.84%)                               | ko04145    |
| 51 | Alanine, aspartate and glutamate metabolism           | 101 (0.83%)                               | ko00250    |
| 52 | Aminoacyl-tRNA biosynthesis                           | 100 (0.82%)                               | ko00970    |
| 53 | DNA replication                                       | 97 (0.79%)                                | ko03030    |
| 54 | Propanoate metabolism                                 | 97 (0.79%)                                | ko00640    |
| 55 | Valine, leucine and isoleucine degradation            | 93 (0.76%)                                | ko00280    |
| 56 | Basal transcription factors                           | 91 (0.74%)                                | ko03022    |
| 57 | N-Glycan biosynthesis                                 | 90 (0.74%)                                | ko00510    |
| 58 | Inositol phosphate metabolism                         | 85 (0.69%)                                | ko00562    |
| 59 | Pantothenate and CoA biosynthesis                     | 80 (0.65%)                                | ko00770    |
| 60 | Biosynthesis of unsaturated fatty acids               | 77 (0.63%)                                | ko01040    |
| 61 | Citrate cycle (TCA cycle)                             | 77 (0.63%)                                | ko00020    |
| 62 | Taurine and hypotaurine metabolism                    | 76 (0.62%)                                | ko00430    |
| 63 | Glycosylphosphatidylinositol(GPI)-anchor biosynthesis | 74 (0.6%)                                 | ko00563    |
| 64 | Glyoxylate and dicarboxylate metabolism               | 74 (0.6%)                                 | ko00630    |
| 65 | Arachidonic acid metabolism                           | 73 (0.6%)                                 | ko00590    |
| 66 | Phenylalanine, tyrosine and tryptophan biosynthesis   | 71 (0.58%)                                | ko00400    |
| 67 | Base excision repair                                  | 70 (0.57%)                                | ko03410    |
| 68 | Various types of N-glycan biosynthesis                | 68 (0.56%)                                | ko00513    |
| 69 | Ether lipid metabolism                                | 68 (0.56%)                                | ko00565    |
| 70 | Sphingolipid metabolism                               | 64 (0.52%)                                | ko00600    |
| 71 | beta-Alanine metabolism                               | 64 (0.52%)                                | ko00410    |
| 72 | Valine, leucine and isoleucine biosynthesis           | 62 (0.51%)                                | ko00290    |
| 73 | Regulation of autophagy                               | 62 (0.51%)                                | ko04140    |
| 74 | Ubiquinone and other terpenoid-quinone biosynthesis   | 61 (0.5%)                                 | ko00130    |
| 75 | Pentose phosphate pathway                             | 59 (0.48%)                                | ko00030    |
| 76 | Mismatch repair                                       | 58 (0.47%)                                | ko03430    |
| 77 | Riboflavin metabolism                                 | 58 (0.47%)                                | ko00740    |
| 78 | Porphyrin and chlorophyll metabolism                  | 57 (0.47%)                                | ko00860    |
| 79 | Lysine biosynthesis                                   | 57 (0.47%)                                | ko00300    |
| 80 | Nicotinate and nicotinamide metabolism                | 57 (0.47%)                                | ko00760    |
| 81 | Proteasome                                            | 57 (0.47%)                                | ko03050    |
| 82 | Phosphatidylinositol signaling system                 | 54 (0.44%)                                | ko04070    |
| 83 | Folate biosynthesis                                   | 50 (0.41%)                                | ko00790    |

**Table S1. Cont.**

|     | <b>Pathway</b>                              | <b>All genes with pathway annotation (12232)</b> | <b>Pathway ID</b> |
|-----|---------------------------------------------|--------------------------------------------------|-------------------|
| 84  | SNARE interactions in vesicular transport   | 50 (0.41%)                                       | ko04130           |
| 85  | Terpenoid backbone biosynthesis             | 45 (0.37%)                                       | ko00900           |
| 86  | One carbon pool by folate                   | 42 (0.34%)                                       | ko00670           |
| 87  | Sulfur metabolism                           | 42 (0.34%)                                       | ko00920           |
| 88  | Sulfur relay system                         | 41 (0.34%)                                       | ko04122           |
| 89  | Penicillin and cephalosporin biosynthesis   | 33 (0.27%)                                       | ko00311           |
| 90  | Synthesis and degradation of ketone bodies  | 32 (0.26%)                                       | ko00072           |
| 91  | Fatty acid elongation                       | 29 (0.24%)                                       | ko00062           |
| 92  | Selenocompound metabolism                   | 26 (0.21%)                                       | ko00450           |
| 93  | Vitamin B6 metabolism                       | 25 (0.2%)                                        | ko00750           |
| 94  | Protein export                              | 24 (0.2%)                                        | ko03060           |
| 95  | Biotin metabolism                           | 24 (0.2%)                                        | ko00780           |
| 96  | Other glycan degradation                    | 23 (0.19%)                                       | ko00511           |
| 97  | alpha-Linolenic acid metabolism             | 21 (0.17%)                                       | ko00592           |
| 98  | Ascorbate and aldarate metabolism           | 21 (0.17%)                                       | ko00053           |
| 99  | Thiamine metabolism                         | 21 (0.17%)                                       | ko00730           |
| 100 | Natural killer cell mediated cytotoxicity   | 16 (0.13%)                                       | ko04650           |
| 101 | Circadian rhythm—mammal                     | 13 (0.11%)                                       | ko04710           |
| 102 | Other types of O-glycan biosynthesis        | 12 (0.1%)                                        | ko00514           |
| 103 | Glycosaminoglycan degradation               | 11 (0.09%)                                       | ko00531           |
| 104 | Glycosphingolipid biosynthesis—globo series | 11 (0.09%)                                       | ko00603           |
| 105 | C5-Branched dibasic acid metabolism         | 9 (0.07%)                                        | ko00660           |
| 106 | Lipoic acid metabolism                      | 7 (0.06%)                                        | ko00785           |
| 107 | Caffeine metabolism                         | 7 (0.06%)                                        | ko00232           |
| 108 | D-Arginine and D-ornithine metabolism       | 4 (0.03%)                                        | ko00472           |

**Table S2.** Annotation of DEGs for the *A. flavus* transcriptome by KEGG classification.

| <b>Pathway</b>                              | <b>0.93_up<sup>(a)</sup></b> | <b>0.99_up<sup>(b)</sup></b> | <b>Fold</b> |
|---------------------------------------------|------------------------------|------------------------------|-------------|
| Endocytosis                                 | 3                            | 33                           | 11          |
| Folate biosynthesis                         | 2                            | 14                           | 7           |
| Valine, leucine and isoleucine biosynthesis | 2                            | 12                           | 6           |
| C5-Branched dibasic acid metabolism         | 1                            | 4                            | 4           |
| Fatty acid biosynthesis                     | 6                            | 22                           | 3.6         |
| Biosynthesis of unsaturated fatty acids     | 6                            | 21                           | 3.5         |
| Aminoacyl-tRNA biosynthesis                 | 4                            | 14                           | 3.5         |
| Ether lipid metabolism                      | 3                            | 9                            | 3           |
| Pantothenate and CoA biosynthesis           | 5                            | 14                           | 2.8         |
| Biotin metabolism                           | 3                            | 8                            | 2.6         |
| Fatty acid elongation                       | 3                            | 8                            | 2.6         |
| Riboflavin metabolism                       | 6                            | 15                           | 2.5         |
| Ubiquitin mediated proteolysis              | 4                            | 9                            | 2.2         |
| Purine metabolism                           | 28                           | 61                           | 2.1         |
| Sphingolipid metabolism                     | 6                            | 13                           | 2.1         |
| ABC transporters                            | 15                           | 32                           | 2.1         |

**Table S2. Cont.**

| <b>Pathway</b>                                      | <b>0.93_up<sup>(a)</sup></b> | <b>0.99_up<sup>(b)</sup></b> | <b>Fold</b> |
|-----------------------------------------------------|------------------------------|------------------------------|-------------|
| Non-homologous end-joining                          | 9                            | 19                           | 2.1         |
| Homologous recombination                            | 10                           | 21                           | 2.1         |
| Arachidonic acid metabolism                         | 8                            | 15                           | 1.8         |
| Taurine and hypotaurine metabolism                  | 8                            | 15                           | 1.8         |
| Steroid biosynthesis                                | 23                           | 43                           | 1.8         |
| Inositol phosphate metabolism                       | 6                            | 11                           | 1.8         |
| Pentose and glucuronate interconversions            | 11                           | 20                           | 1.8         |
| Meiosis—yeast                                       | 25                           | 45                           | 1.8         |
| Lysine degradation                                  | 26                           | 45                           | 1.7         |
| Alanine, aspartate and glutamate metabolism         | 11                           | 18                           | 1.6         |
| Phagosome                                           | 5                            | 8                            | 1.6         |
| Phenylalanine, tyrosine and tryptophan biosynthesis | 5                            | 8                            | 1.6         |
| Mismatch repair                                     | 4                            | 6                            | 1.5         |
| Thiamine metabolism                                 | 4                            | 6                            | 1.5         |
| Butanoate metabolism                                | 29                           | 42                           | 1.4         |
| Cyanoamino acid metabolism                          | 25                           | 36                           | 1.4         |
| Glycine, serine and threonine metabolism            | 28                           | 40                           | 1.4         |
| Pentose phosphate pathway                           | 7                            | 10                           | 1.4         |
| Valine, leucine and isoleucine degradation          | 7                            | 10                           | 1.4         |
| Spliceosome                                         | 15                           | 21                           | 1.4         |
| Glutathione metabolism                              | 16                           | 21                           | 1.3         |
| Starch and sucrose metabolism                       | 68                           | 88                           | 1.2         |
| Peroxisome                                          | 21                           | 27                           | 1.2         |
| Pyrimidine metabolism                               | 22                           | 28                           | 1.2         |
| Biosynthesis of secondary metabolites               | 188                          | 238                          | 1.2         |
| Arginine and proline metabolism                     | 19                           | 24                           | 1.2         |
| Glycerophospholipid metabolism                      | 28                           | 35                           | 1.2         |
| Metabolic pathways                                  | 414                          | 515                          | 1.2         |
| Pyruvate metabolism                                 | 10                           | 12                           | 1.2         |
| Sulfur relay system                                 | 5                            | 6                            | 1.2         |
| MAPK signaling pathway—yeast                        | 42                           | 50                           | 1.1         |
| Lysine biosynthesis                                 | 6                            | 7                            | 1.1         |
| Cell cycle—yeast                                    | 31                           | 35                           | 1.1         |
| Citrate cycle (TCA cycle)                           | 8                            | 9                            | 1.1         |
| RNA degradation                                     | 27                           | 30                           | 1.1         |
| Various types of N-glycan biosynthesis              | 9                            | 10                           | 1.1         |
| RNA polymerase                                      | 10                           | 11                           | 1.1         |
| Linoleic acid metabolism                            | 23                           | 24                           | 1.0         |
| Galactose metabolism                                | 16                           | 16                           | 1           |
| Basal transcription factors                         | 7                            | 7                            | 1           |
| DNA replication                                     | 6                            | 6                            | 1           |
| Ubiquinone and other terpenoid-quinone biosynthesis | 4                            | 4                            | 1           |

Table S2. *Cont.*

| Pathway                                               | 0.93_up <sup>(a)</sup> | 0.99_up <sup>(b)</sup> | Fold |
|-------------------------------------------------------|------------------------|------------------------|------|
| Ascorbate and aldarate metabolism                     | 2                      | 2                      | 1    |
| Natural killer cell mediated cytotoxicity             | 2                      | 2                      | 1    |
| Amino sugar and nucleotide sugar metabolism           | 51                     | 49                     | 0.96 |
| Histidine metabolism                                  | 20                     | 19                     | 0.95 |
| Phenylalanine metabolism                              | 20                     | 19                     | 0.95 |
| Protein processing in endoplasmic reticulum           | 20                     | 19                     | 0.95 |
| Fructose and mannose metabolism                       | 32                     | 30                     | 0.93 |
| RNA transport                                         | 31                     | 29                     | 0.93 |
| Tyrosine metabolism                                   | 30                     | 28                     | 0.93 |
| Propanoate metabolism                                 | 15                     | 14                     | 0.93 |
| Glycerolipid metabolism                               | 13                     | 12                     | 0.92 |
| Nitrogen metabolism                                   | 20                     | 18                     | 0.90 |
| Base excision repair                                  | 6                      | 5                      | 0.83 |
| Ribosome biogenesis in eukaryotes                     | 23                     | 19                     | 0.82 |
| Phosphatidylinositol signaling system                 | 5                      | 4                      | 0.80 |
| mRNA surveillance pathway                             | 19                     | 15                     | 0.78 |
| Porphyrin and chlorophyll metabolism                  | 8                      | 6                      | 0.75 |
| Fatty acid metabolism                                 | 24                     | 17                     | 0.70 |
| Oxidative phosphorylation                             | 17                     | 12                     | 0.70 |
| Nicotinate and nicotinamide metabolism                | 3                      | 2                      | 0.66 |
| Tryptophan metabolism                                 | 36                     | 23                     | 0.63 |
| One carbon pool by folate                             | 8                      | 5                      | 0.62 |
| beta-Alanine metabolism                               | 13                     | 8                      | 0.61 |
| Nucleotide excision repair                            | 10                     | 6                      | 0.60 |
| Penicillin and cephalosporin biosynthesis             | 12                     | 7                      | 0.58 |
| Selenocompound metabolism                             | 7                      | 4                      | 0.57 |
| Glycolysis/Gluconeogenesis                            | 23                     | 12                     | 0.52 |
| Other glycan degradation                              | 2                      | 1                      | 0.50 |
| Methane metabolism                                    | 23                     | 11                     | 0.47 |
| Ribosome                                              | 48                     | 22                     | 0.45 |
| Sulfur metabolism                                     | 5                      | 2                      | 0.40 |
| Terpenoid backbone biosynthesis                       | 5                      | 2                      | 0.40 |
| Cysteine and methionine metabolism                    | 13                     | 5                      | 0.38 |
| alpha-Linolenic acid metabolism                       | 4                      | 1                      | 0.25 |
| N-Glycan biosynthesis                                 | 12                     | 2                      | 0.16 |
| Glyoxylate and dicarboxylate metabolism               | 15                     | 0                      | 0    |
| Glycosylphosphatidylinositol(GPI)-anchor biosynthesis | 5                      | 0                      | 0    |
| Protein export                                        | 5                      | 0                      | 0    |
| Lipoic acid metabolism                                | 1                      | 0                      | 0    |
| Proteasome                                            | 1                      | 0                      | 0    |
| Caffeine metabolism                                   | 0                      | 5                      | ∞    |
| Circadian rhythm—mammal                               | 0                      | 2                      | ∞    |
| Glycosaminoglycan degradation                         | 0                      | 2                      | ∞    |

**Table S2. Cont.**

| <b>Pathway</b>                                        | <b>0.93_up<sup>(a)</sup></b> | <b>0.99_up<sup>(b)</sup></b> | <b>Fold</b> |
|-------------------------------------------------------|------------------------------|------------------------------|-------------|
| Glycosphingolipid biosynthesis—globo series           | 0                            | 1                            | $\infty$    |
| Glycosylphosphatidylinositol(GPI)-anchor biosynthesis | 0                            | 2                            | $\infty$    |
| Glyoxylate and dicarboxylate metabolism               | 0                            | 9                            | $\infty$    |
| Regulation of autophagy                               | 0                            | 1                            | $\infty$    |
| SNARE interactions in vesicular transport             | 0                            | 4                            | $\infty$    |
| Synthesis and degradation of ketone bodies            | 0                            | 5                            | $\infty$    |
| Vitamin B6 metabolism                                 | 0                            | 7                            | $\infty$    |

<sup>(a)</sup> The total numbers of genes up-regulated in 0.93 a<sub>w</sub> compared to in 0.99 a<sub>w</sub>; <sup>(b)</sup> The total numbers of genes up-regulated in 0.99 a<sub>w</sub> compared to in 0.93 a<sub>w</sub>.
